# Supplementary material for: Isolation and Purification of Chitosan Oligosaccharides (Mw ≤ 1000) and Their Protective Effect on Acute Liver Injury Caused by CCl4
Source: MDPI journal article supplement (doi:10.3390/md22030128), 2024-03-08
Supplement: s1 [file s1]

## Supplementary data

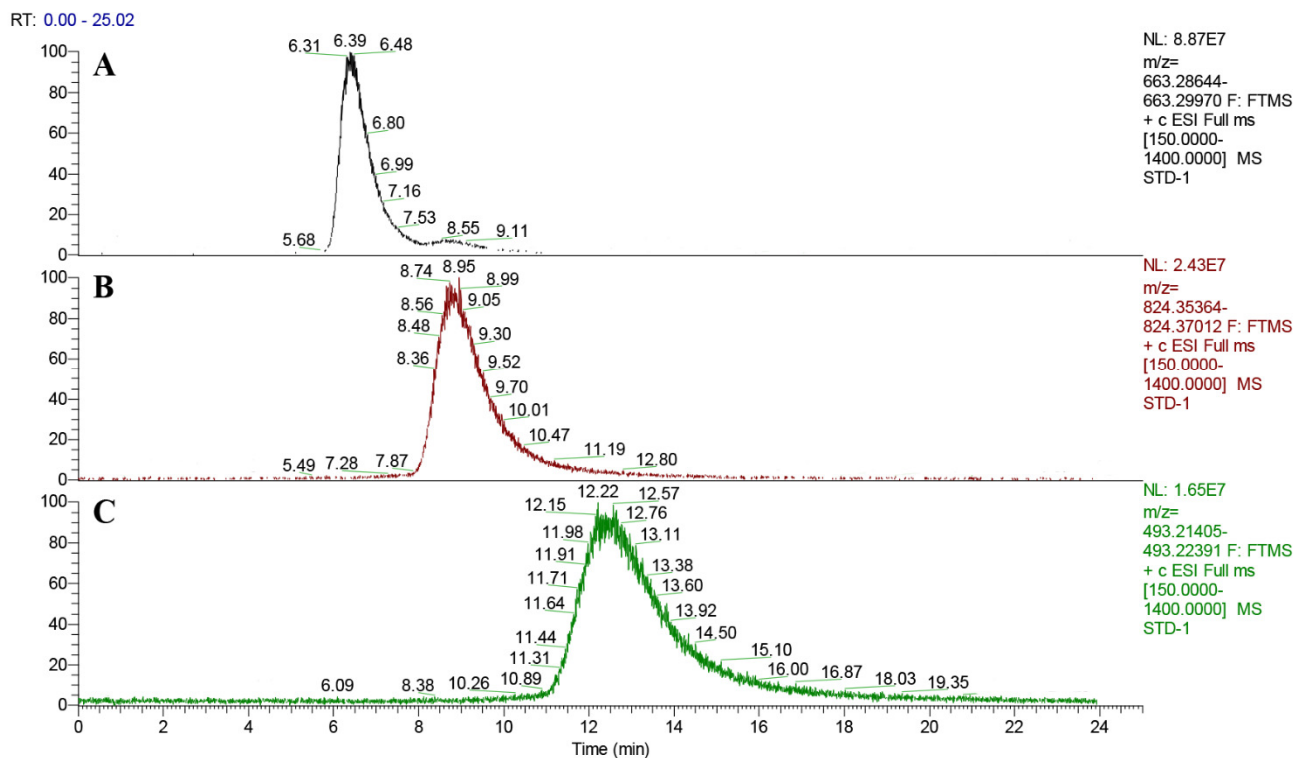

Figure S1 0.0875mg/mL COS4 (A), 0.04375 mg/mL COS5 (B), 0.05625 mg/mL COS6 (C)  
chromatograms of standard products

RT: 0.00 - 25.02

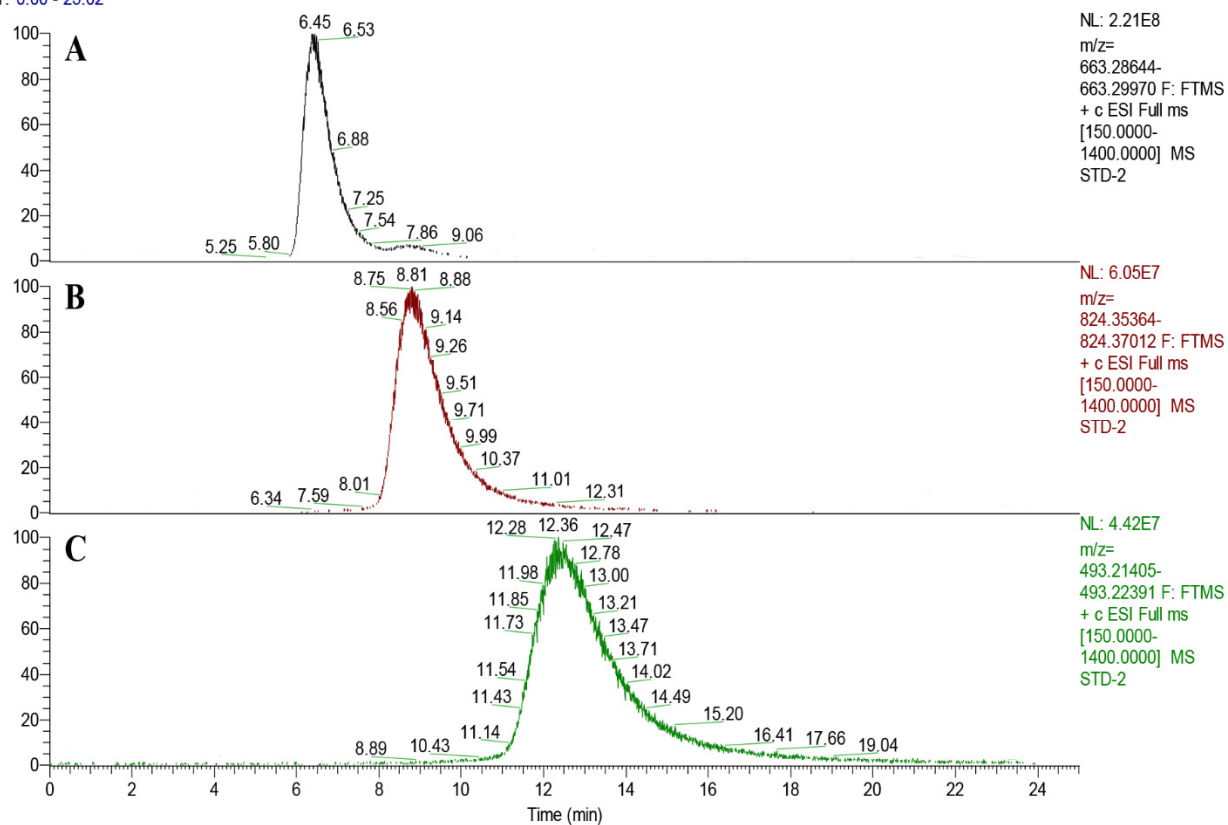

Figure S2 0.175mg/mL COS4 (A), 0.0875mg/mL COS5 (B), 0.1125mg/mL COS6 (C)  
chromatograms of standard products

RT: 0.00 - 25.02

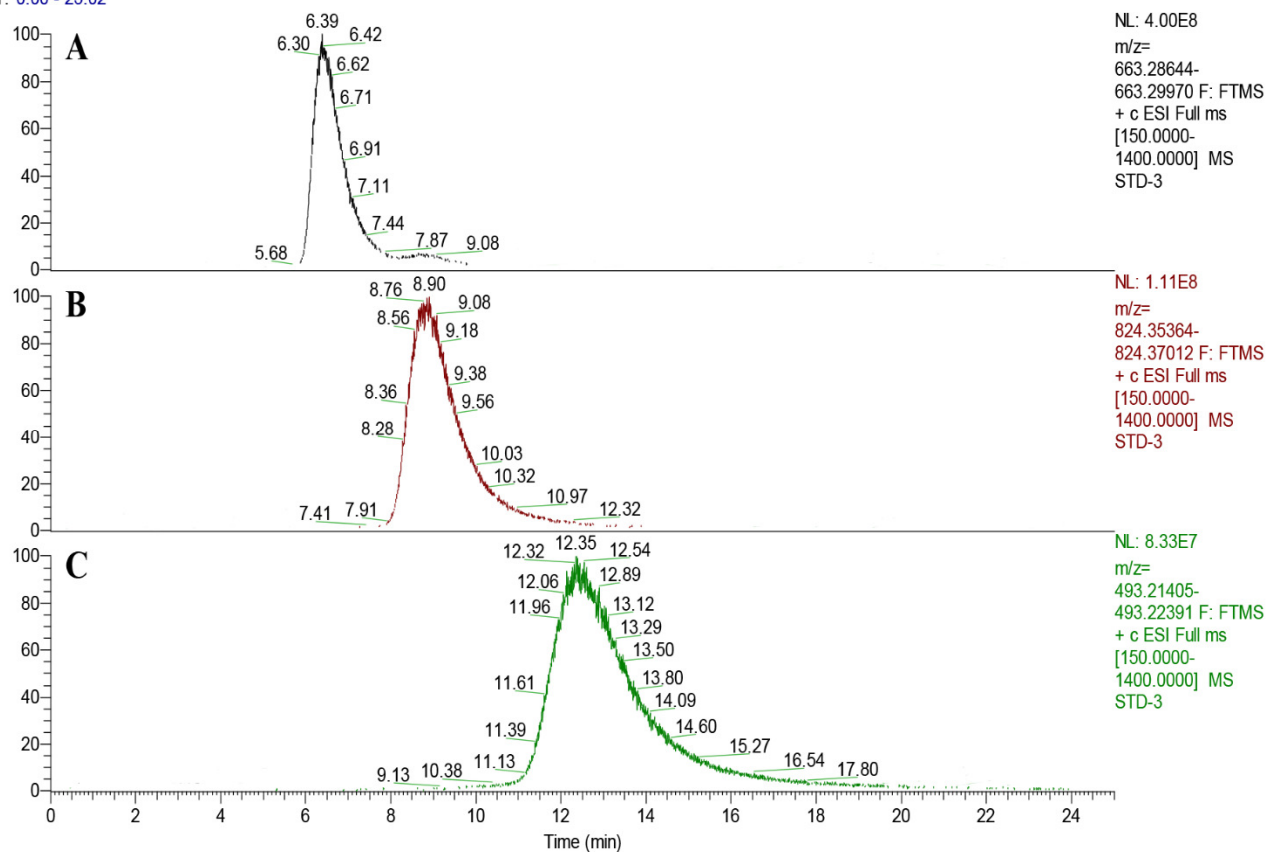

Figure S3 0.350mg/mL COS4 (A), 0.175mg/mL COS5 (B), 0.225mg/mL COS6 (C)  
chromatograms of standard products

RT: 0.00 - 25.01

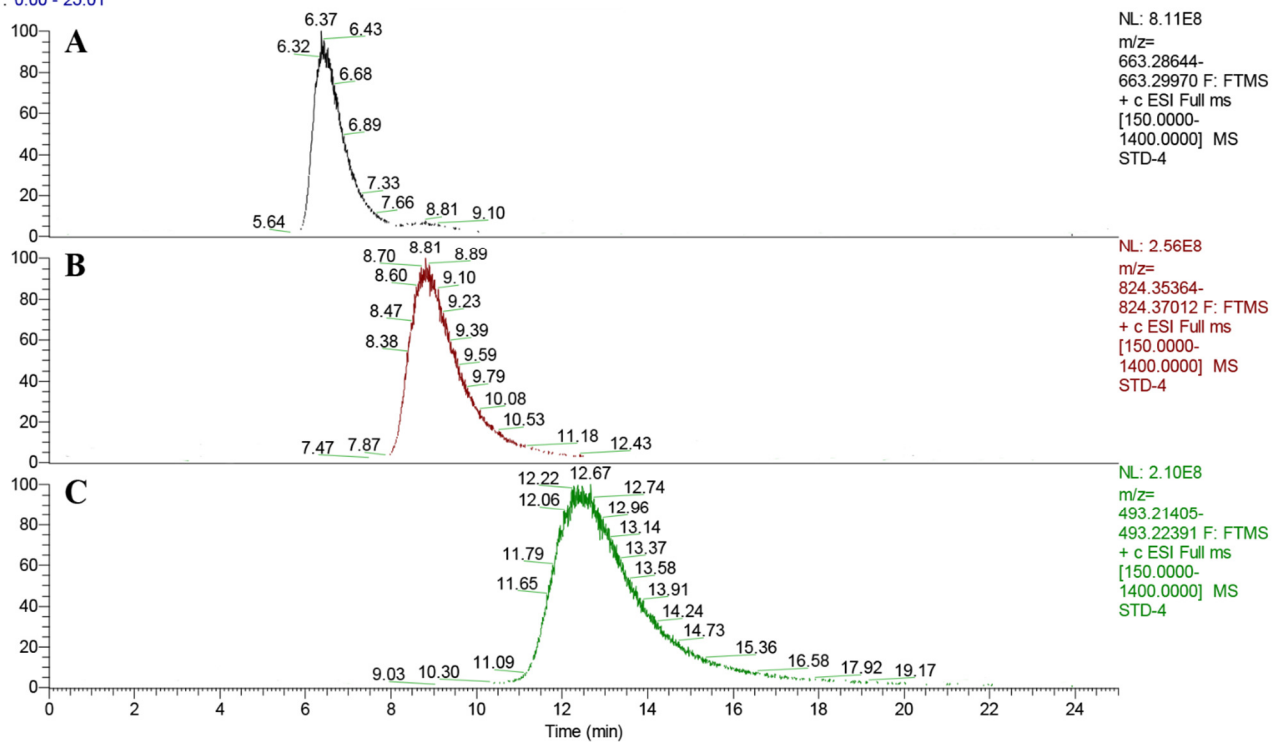

Figure S4 0.700mg/mL COS4 (A), 0.350mg/mL COS5 (B), 0.450mg/mL COS6 (C)  
chromatograms of standard products

RT: 0.00 - 25.01

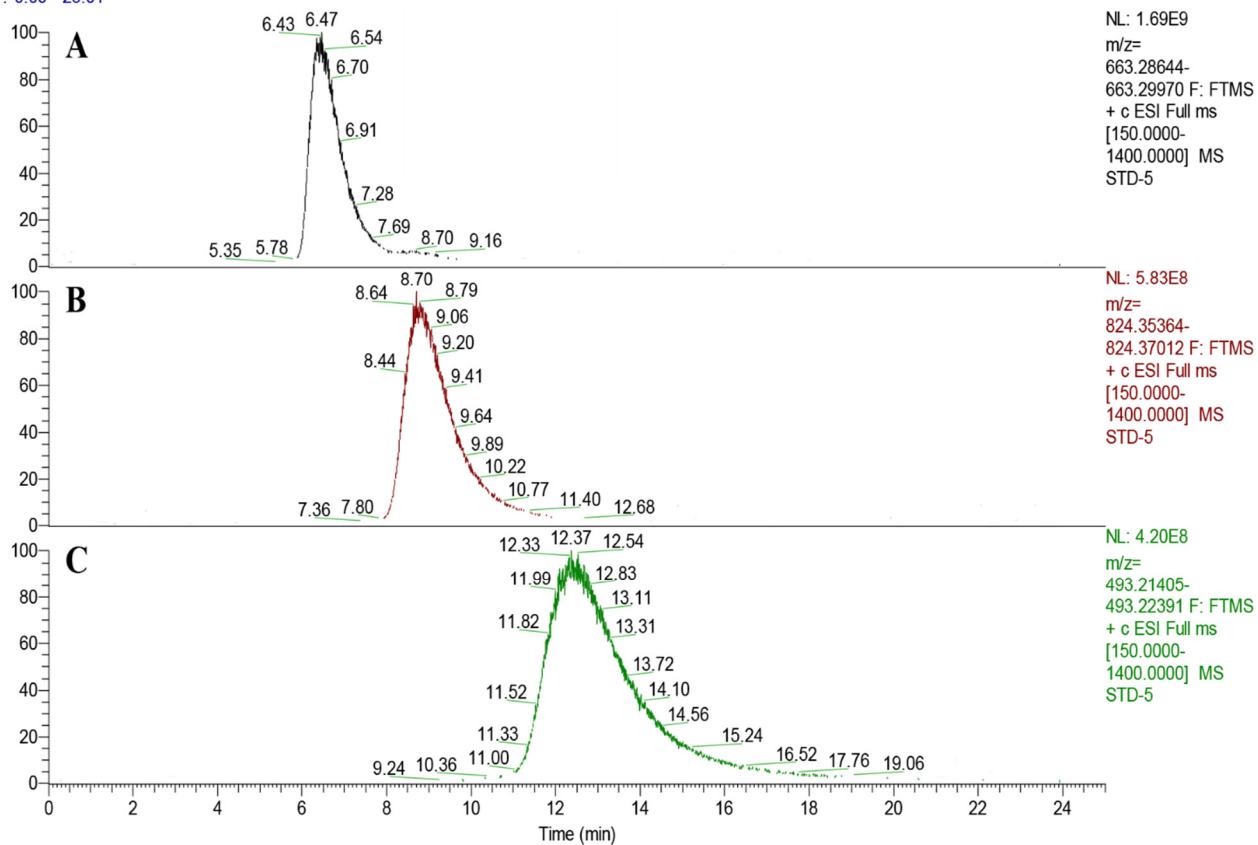

Figure S5 1.400mg/mL COS4 (A), 0.700mg/mL COS5 (B), 0.900mg/mL COS6 (C)  
chromatograms of standard products

RT: 0.00 - 25.02

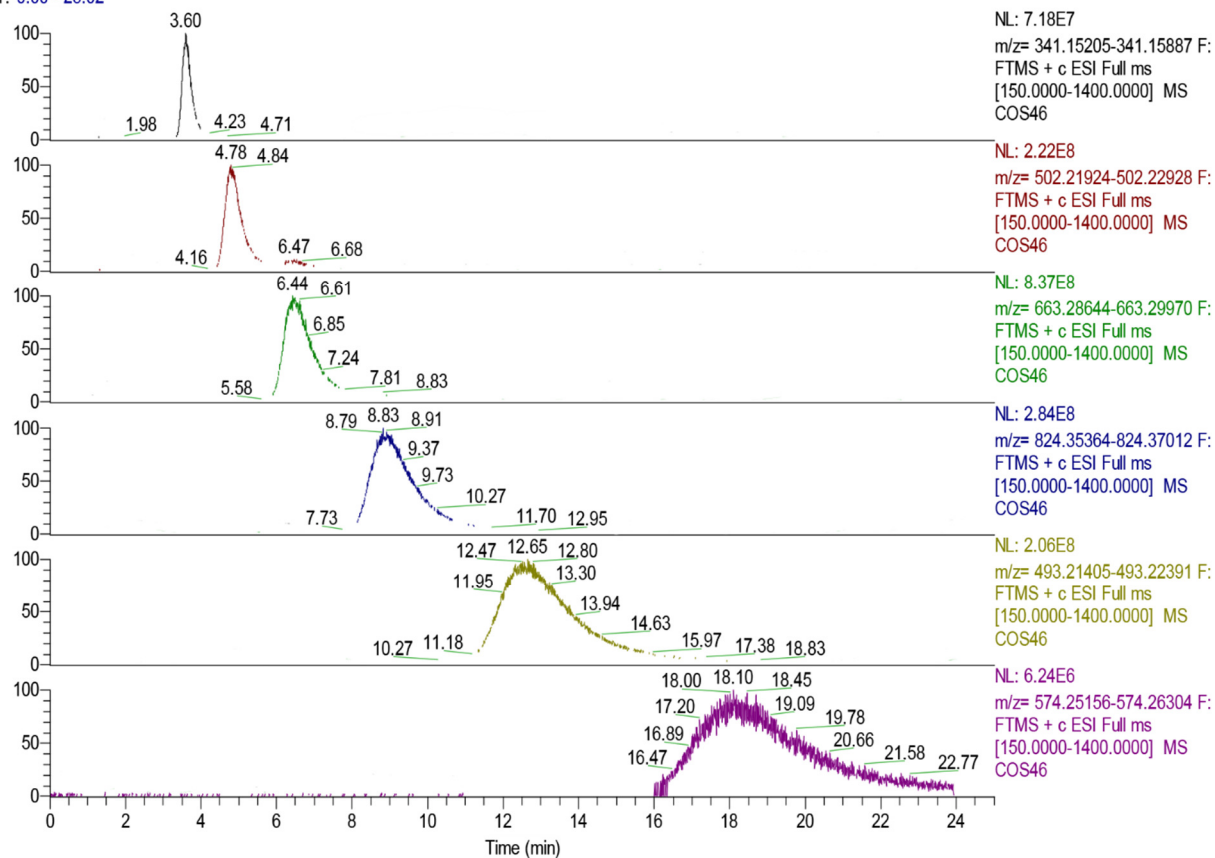

Figure S6 Liquid phase diagram of 1.820mg/mL COS46

RT: 0.00 - 25.01

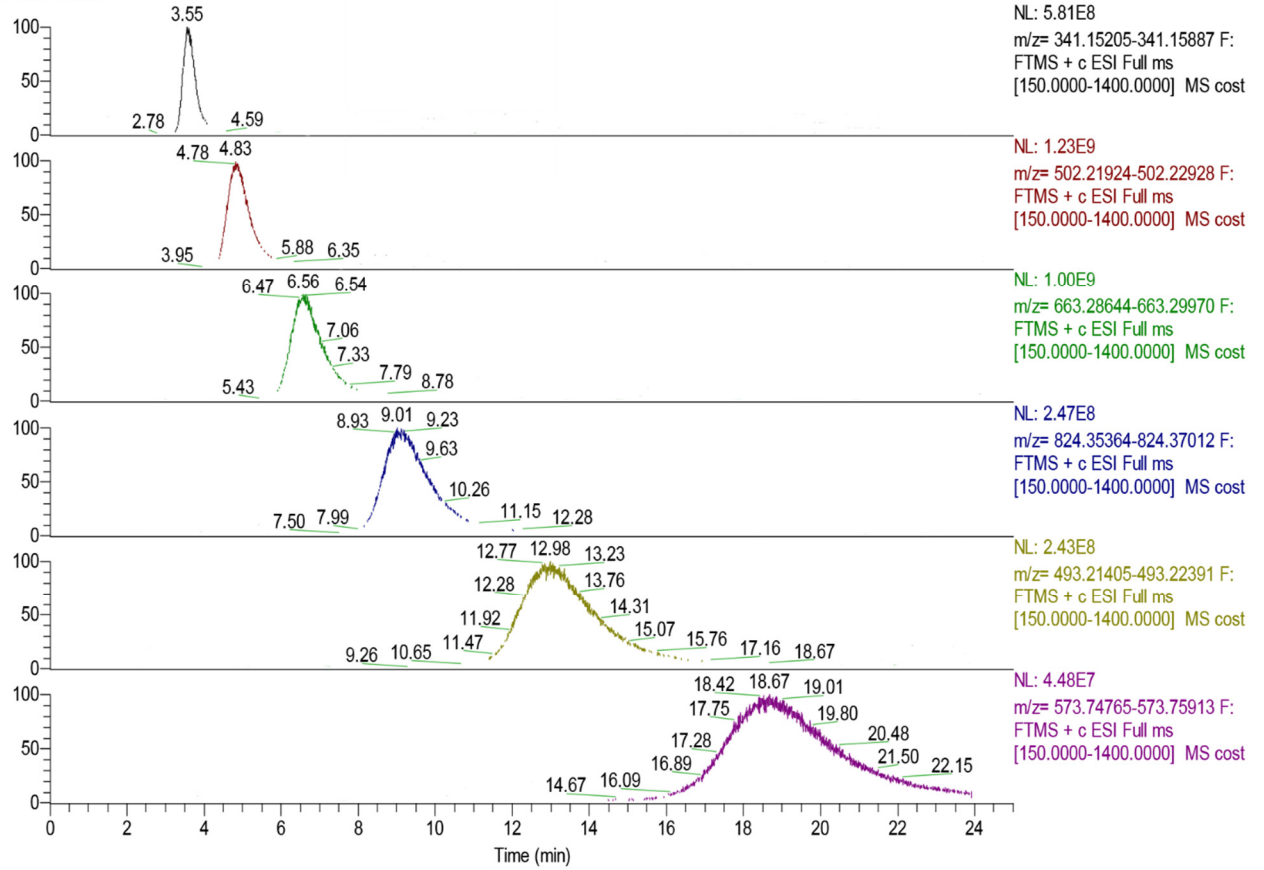

Figure S7 Liquid phase diagram of 3.440mg/mL COST

Table S1 Standard curves of retention time (RT) and concentrations of COS4, COS5 and COS6.

|      | Concentration<br>(mg/mL) | Apex RT | Start RT | End RT | Area | Standard curve                             |
|------|--------------------------|---------|----------|--------|------|--------------------------------------------|
| COS4 | 0.0875                   | 6.39    | 5.72     | 8.08   | 433  | y=6475.3x-228.46<br>R <sup>2</sup> =0.9955 |
|      | 0.175                    | 6.45    | 5.76     | 8.12   | 1096 |                                            |
|      | 0.35                     | 6.39    | 5.68     | 8.08   | 1935 |                                            |
|      | 0.7                      | 6.37    | 5.69     | 8.15   | 3946 |                                            |
|      | 1.4                      | 6.47    | 5.65     | 8.33   | 9012 |                                            |
| COS5 | 0.04375                  | 8.95    | 7.62     | 12.22  | 192  | y=6398.6x-132.42<br>R <sup>2</sup> =0.9987 |
|      | 0.0875                   | 8.81    | 7.65     | 11.91  | 479  |                                            |
|      | 0.175                    | 8.90    | 7.65     | 12.39  | 907  |                                            |
|      | 0.35                     | 8.81    | 7.69     | 11.87  | 2054 |                                            |
|      | 0.7                      | 8.70    | 7.67     | 11.93  | 4384 |                                            |
| COS6 | 0.05625                  | 12.22   | 10.39    | 17.85  | 222  | y=5917.8x-118.04<br>R <sup>2</sup> =0.9938 |
|      | 0.1125                   | 12.36   | 10.75    | 17.24  | 567  |                                            |
|      | 0.225                    | 12.35   | 10.32    | 17.90  | 1020 |                                            |
|      | 0.45                     | 12.67   | 10.62    | 18.36  | 2788 |                                            |
|      | 0.9                      | 12.37   | 10.68    | 17.32  | 5132 |                                            |

Table S2 Liquid phase data of COS46 and COST target components

|       | C/(mg/mL) | Apex RT | Start RT | End RT | Area            |
|-------|-----------|---------|----------|--------|-----------------|
| COS46 | 1.82      | 6.44    | 5.67     | 8.24   | 45242102751     |
|       |           | 8.83    | 7.57     | 12.23  | 23397975217     |
|       |           | 12.65   | 10.32    | 18.33  | 27828611707     |
| COST  | 3.44      | 6.56    | 5.21     | 8.58   | 61663275573.503 |
|       |           | 9.01    | 7.08     | 13.00  | 22671467620.854 |
|       |           | 12.98   | 9.92     | 19.64  | 35211985606.695 |



COS46 #691 RT: 3.60 AV: 1 NL: 2.24E8  
T: FTMS + c ESI Full ms [150.0000-1400.0000]  
305.09952  
z=1

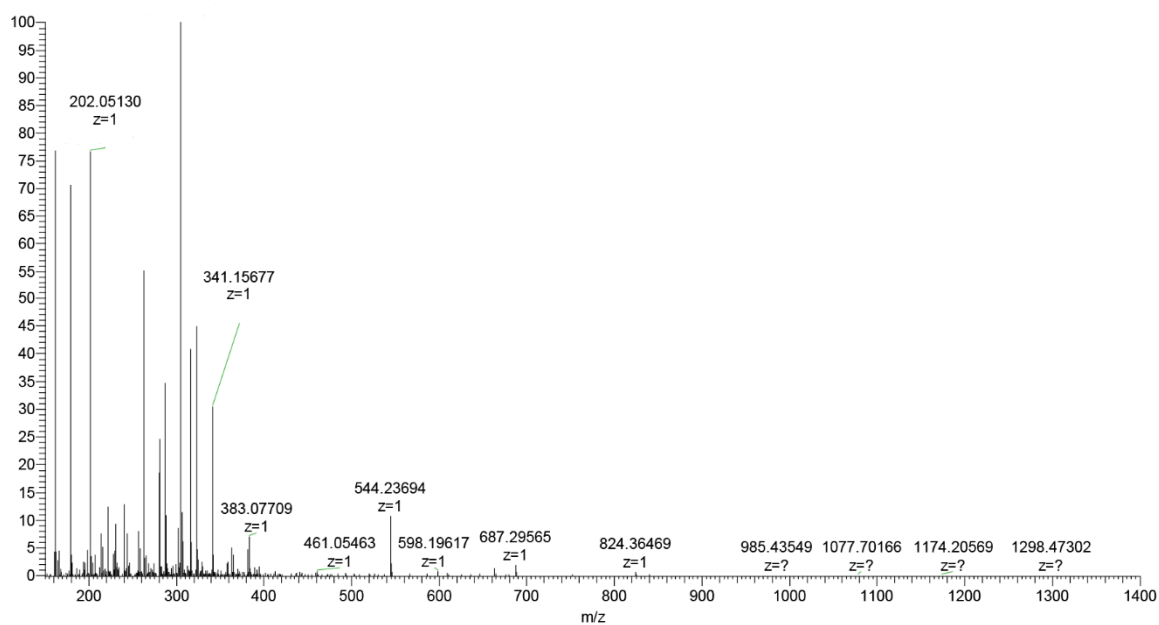

Figure S8 Mass spectrum of COS46 when RT=3.60min

COS46 #917 RT: 4.78 AV: 1 NL: 2.09E8  
T: FTMS + c ESI Full ms [150.0000-1400.0000]

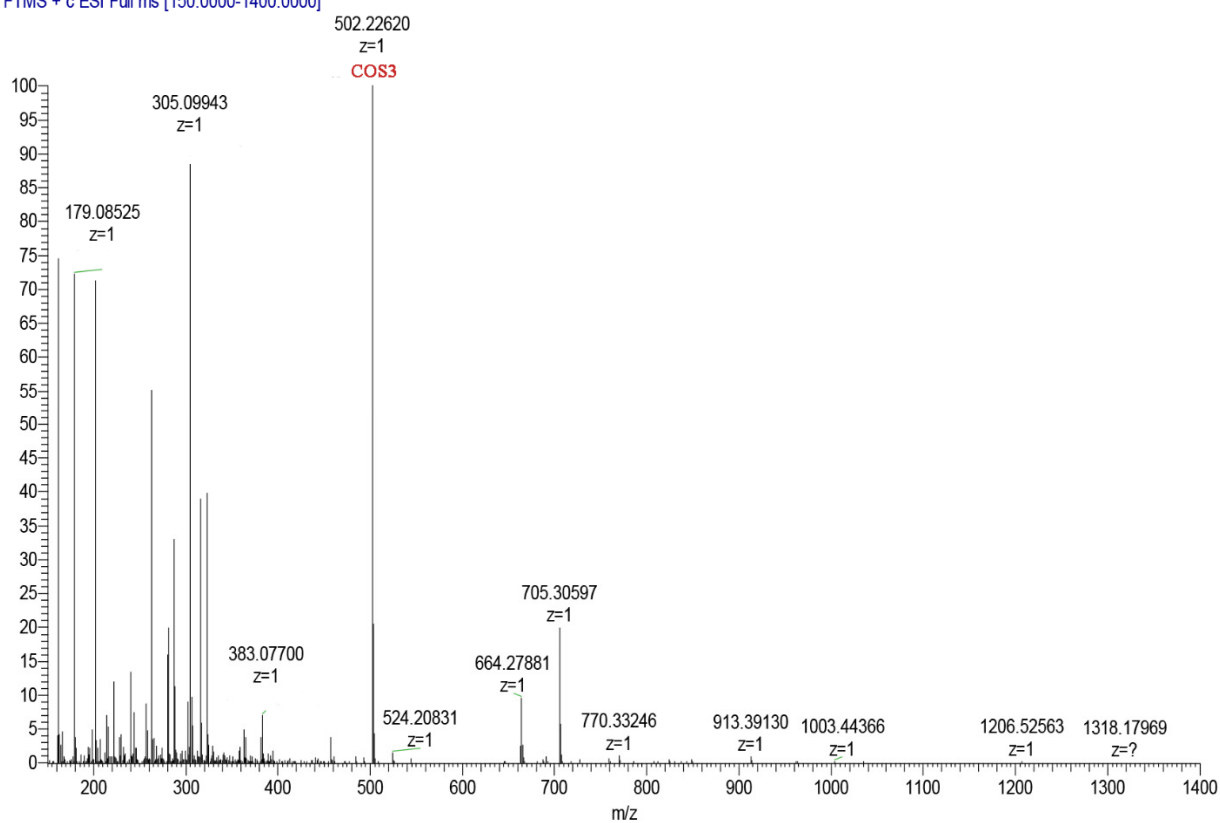

Figure S9 Mass spectrum of COS46 when RT=4.78min

COS46 #1235 RT: 6.44 AV: 1 NL: 8.37E8  
T: FTMS + c ESI Full ms [150.0000-1400.0000]

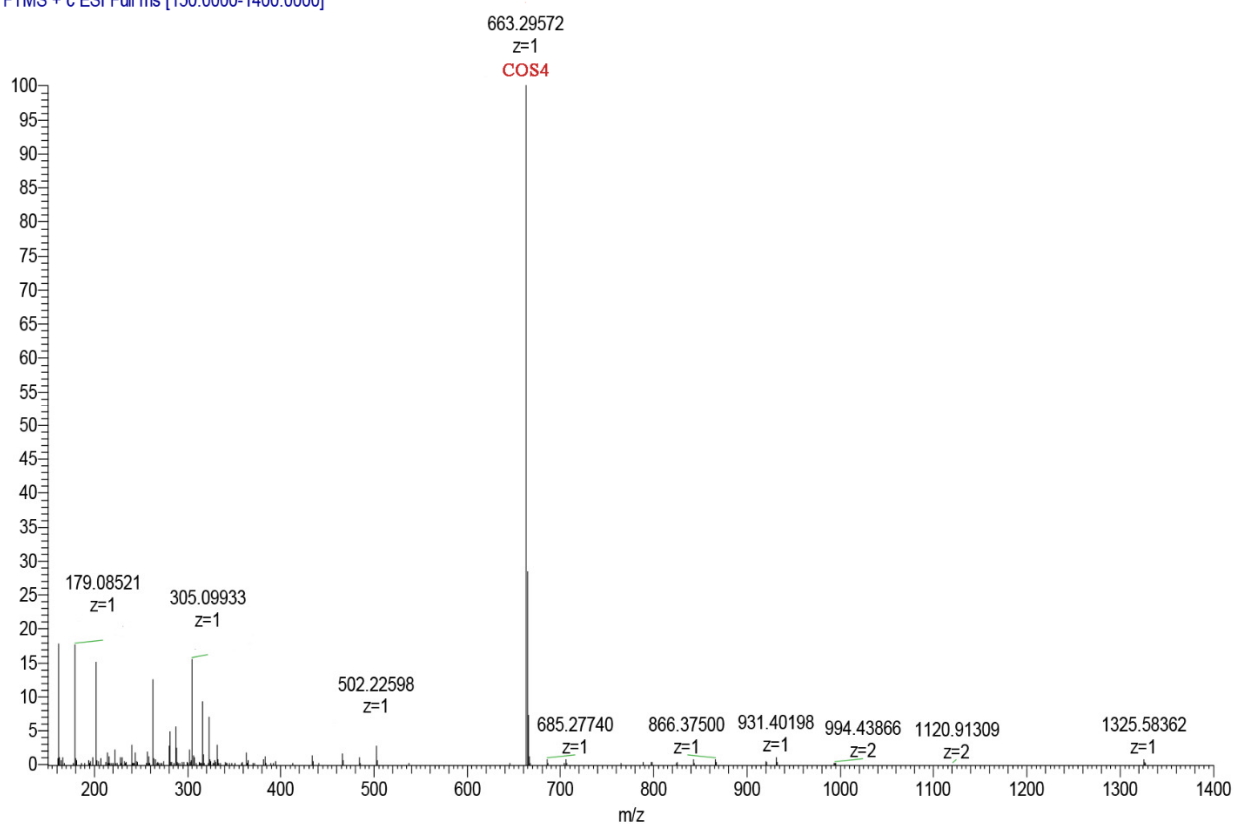

Figure S10 Mass spectrum of COS46 when RT=6.44min

COS46 #1695 RT: 8.83 AV: 1 NL: 2.84E8  
T: FTMS + c ESI Full ms [150.0000-1400.0000]

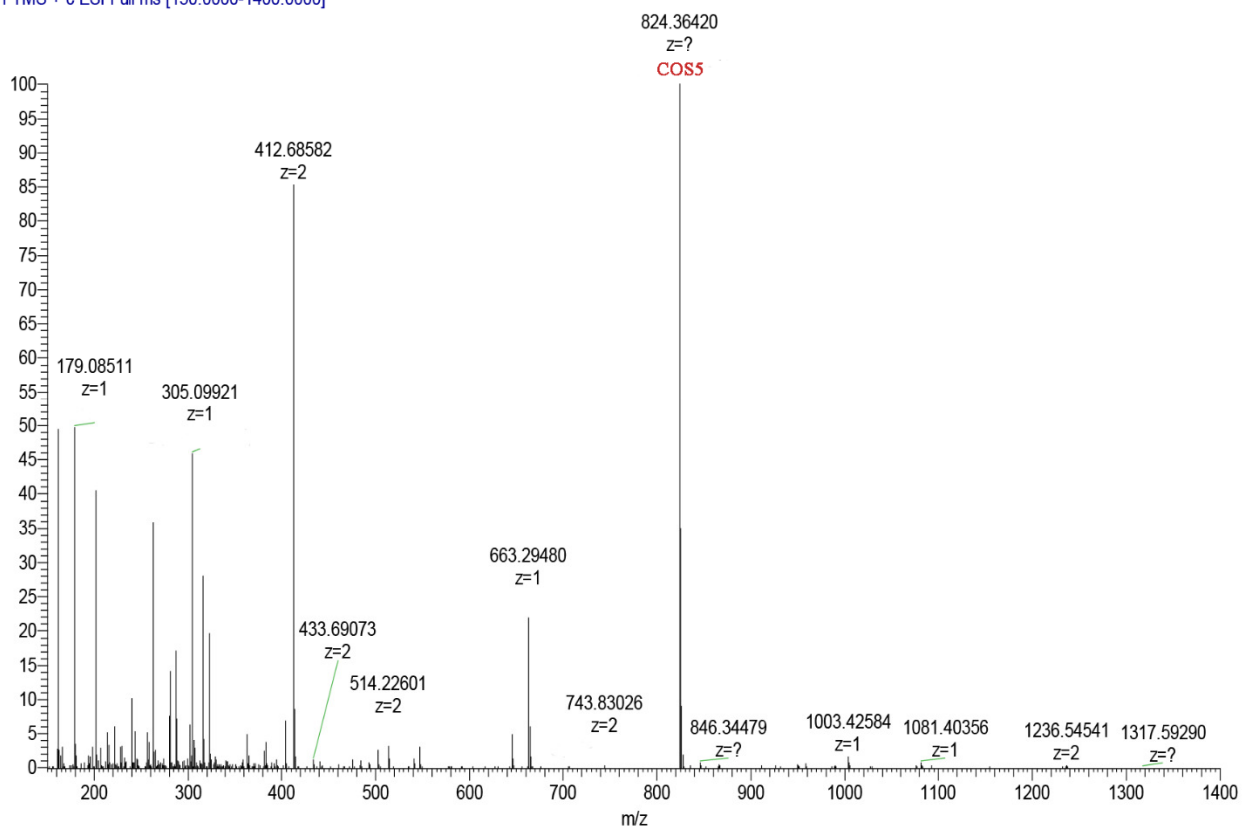

Figure S11 Mass spectrum of COS46 when RT=8.83min

COS46 #2427 RT: 12.65 AV: 1 NL: 1.86E8  
T: FTMS + c ESI Full ms [150.0000-1400.0000]

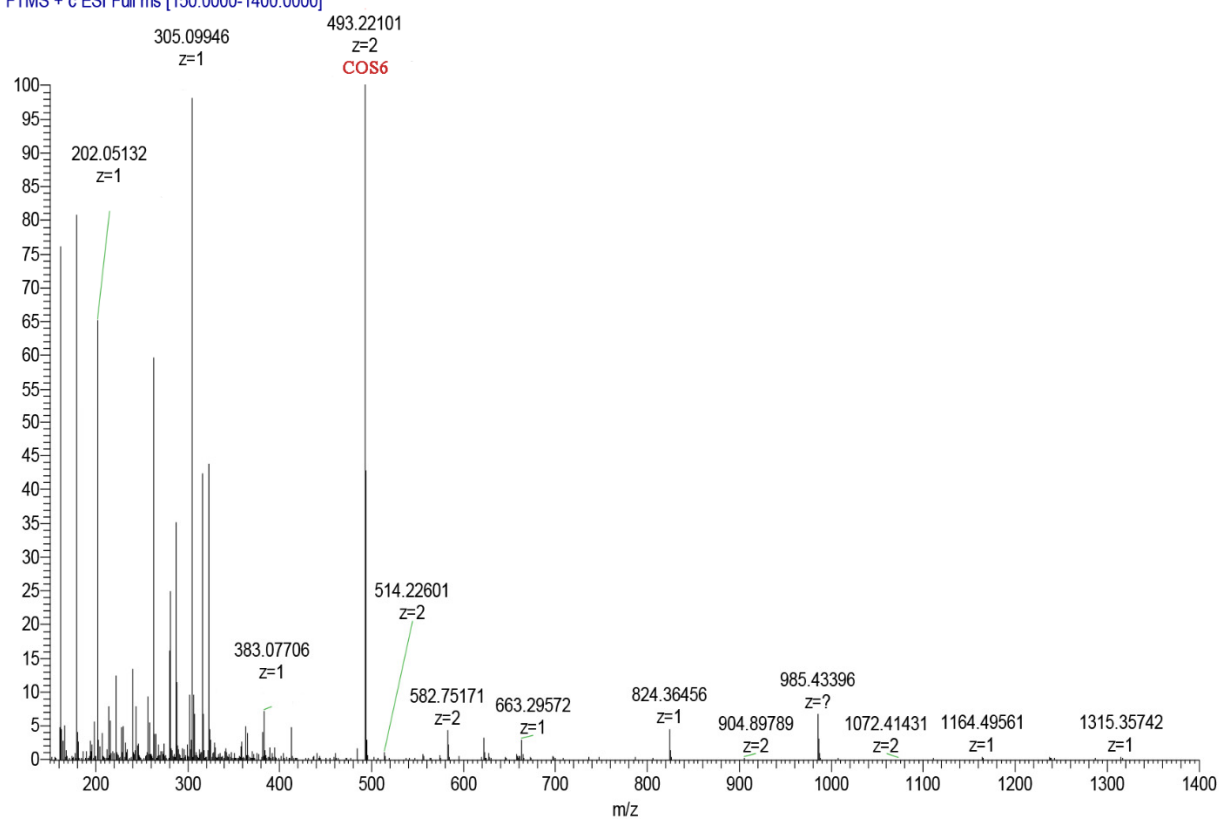

Figure S12 Mass spectrum of COS46 when RT=12.65min

COS46 #3474 RT: 18.10 AV: 1 SB: 704 20.32-24.02 NL: 7.95E6  
T: FTMS + c ESI Full ms [150.0000-1400.0000]

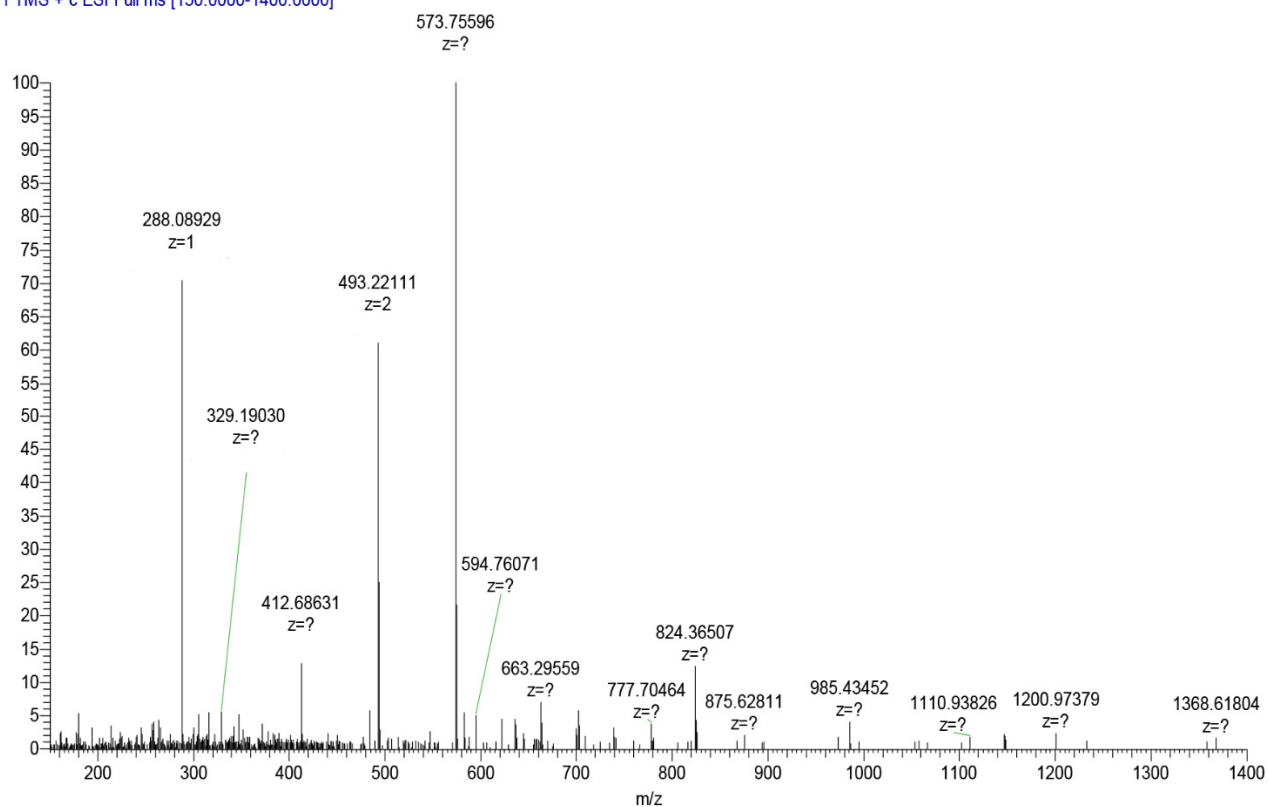

Figure S13 Mass spectrum of COS46 when RT=18.10min

cost #685 RT: 3.55 AV: 1 NL: 5.81E8  
T: FTMS + c ESI Full ms [150.0000-1400.0000]

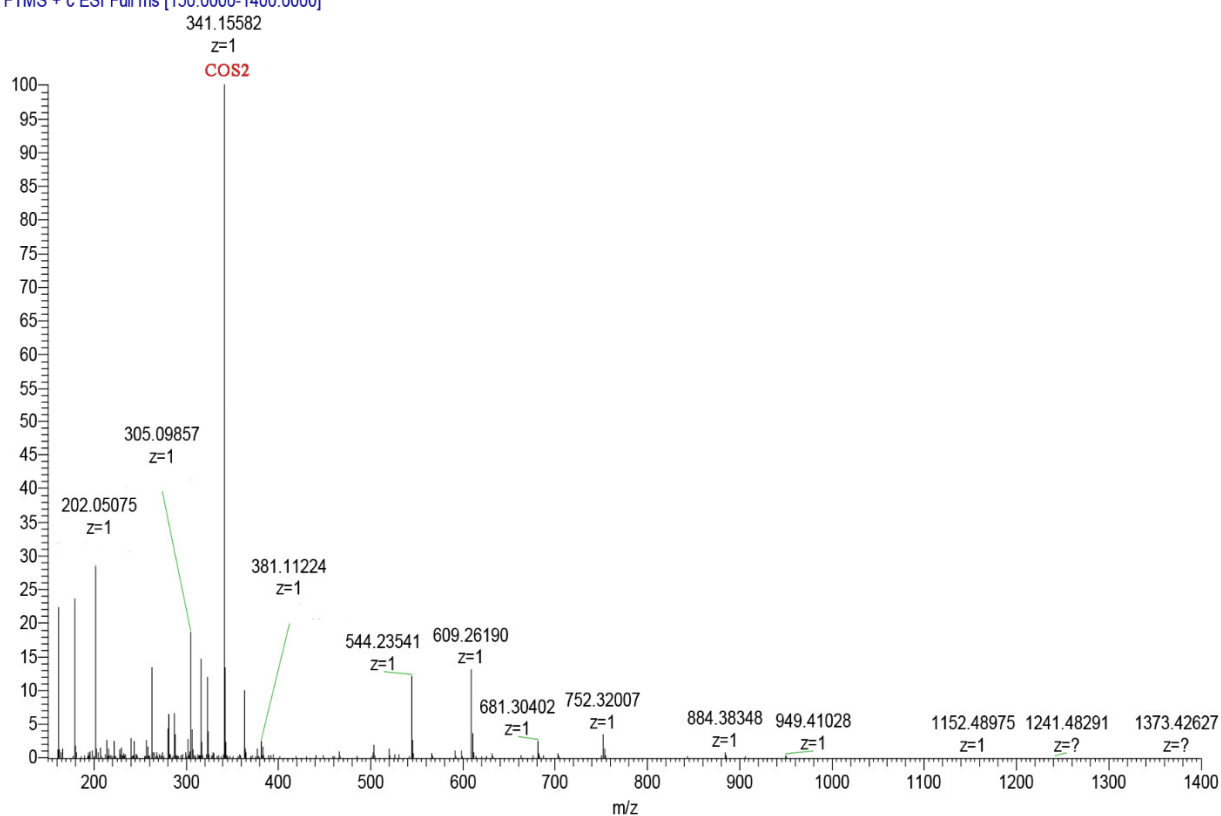

Figure S14 Mass spectrum of COST when RT=3.55min

cost #930 RT: 4.83 AV: 1 NL: 1.23E9  
T: FTMS + c ESI Full ms [150.0000-1400.0000]

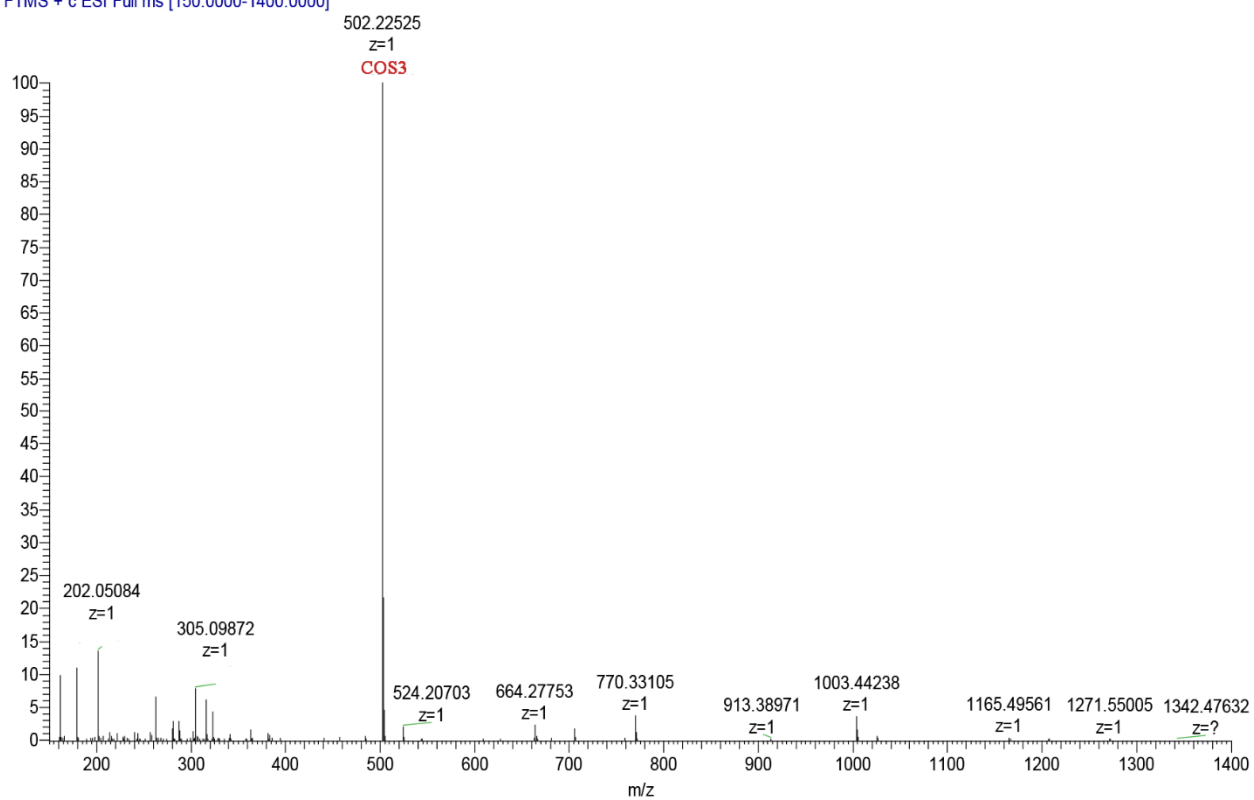

Figure S15 Mass spectrum of COST when RT=4.83min



cost #1264 RT: 6.56 AV: 1 NL: 1.00E9  
T: FTMS + c ESI Full ms [150.0000-1400.0000]

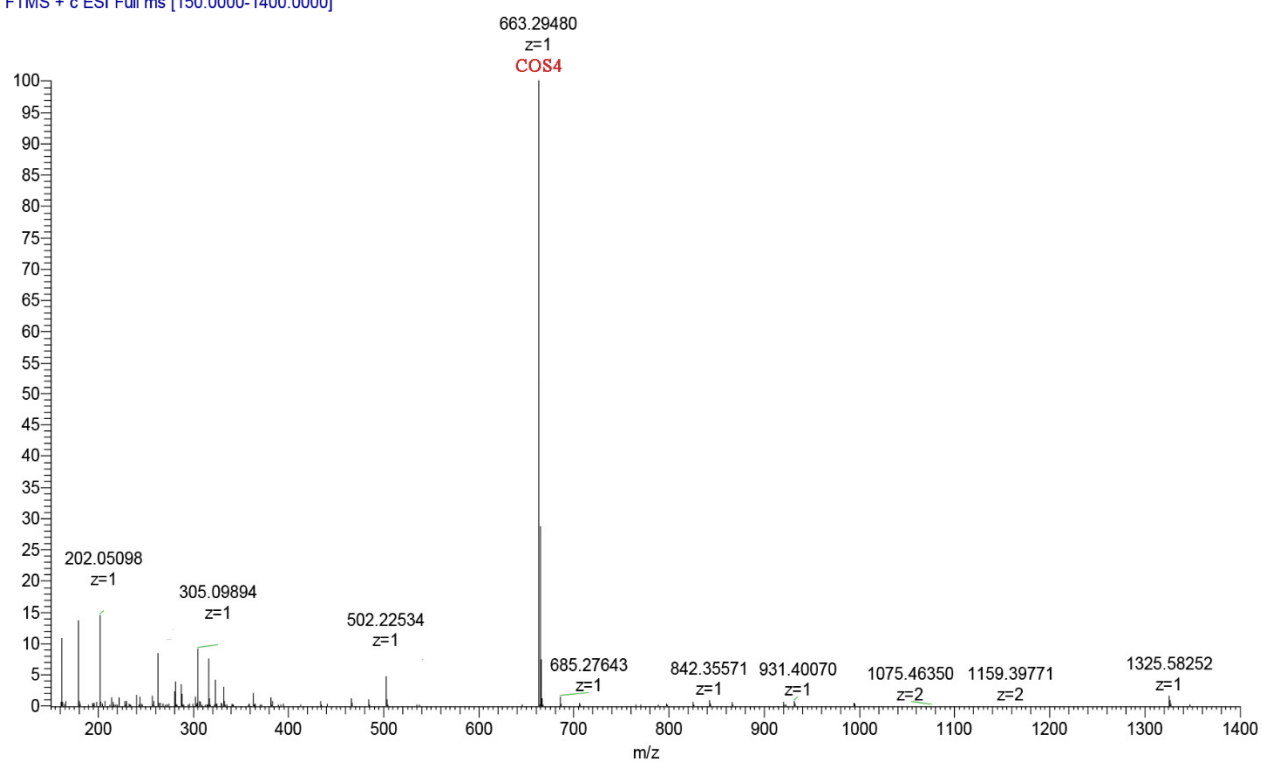

Figure S16 Mass spectrum of COST when RT=6.56min

cost #1734 RT: 9.01 AV: 1 NL: 2.30E8  
T: FTMS + c ESI Full ms [150.0000-1400.0000]

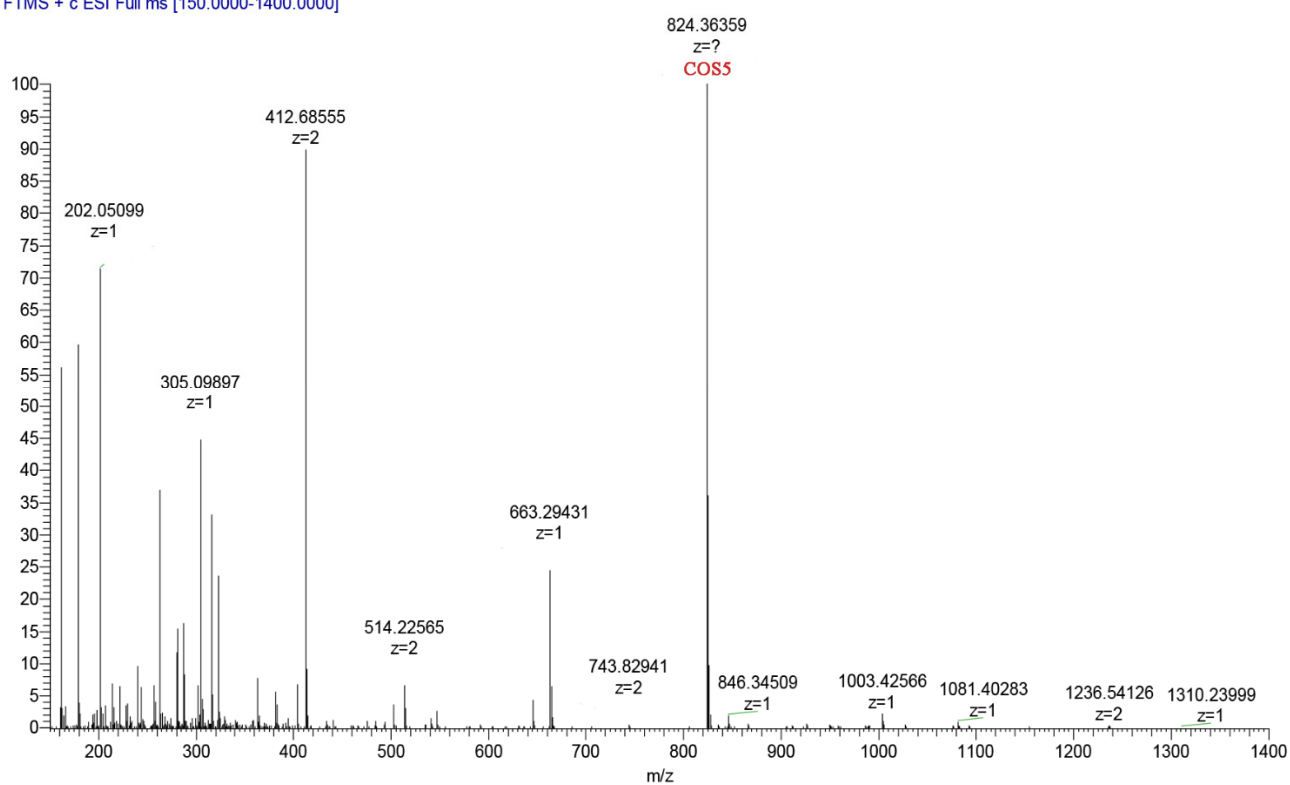

Figure S17 Mass spectrum of COST when RT=9.01min

cost #2495 RT: 12.98 AV: 1 NL: 2.32E8  
T: FTMS + c ESI Full ms [150.0000-1400.0000]

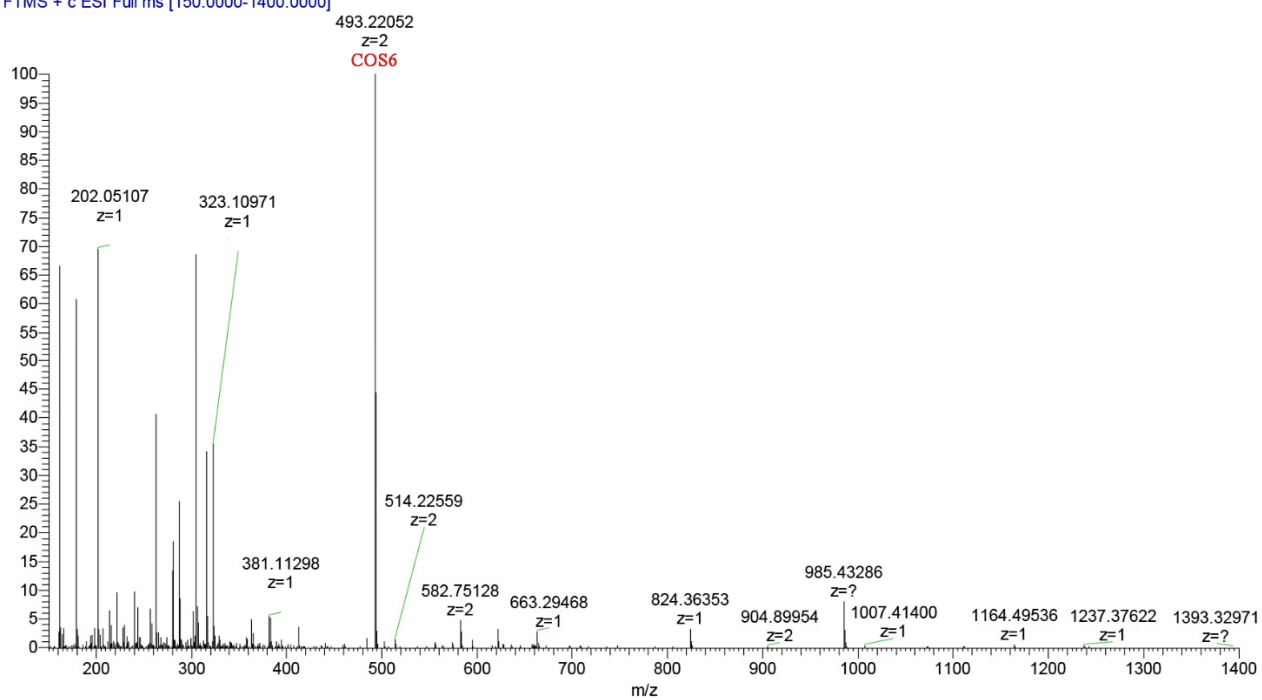

Figure S18 Mass spectrum of COST when RT=12.98min

COST #3587 RT: 18.67 AV: 1 SB: 1212 17.58-23.90 NL: 2.39E7  
T: FTMS + c ESI Full ms [150.0000-1400.0000]

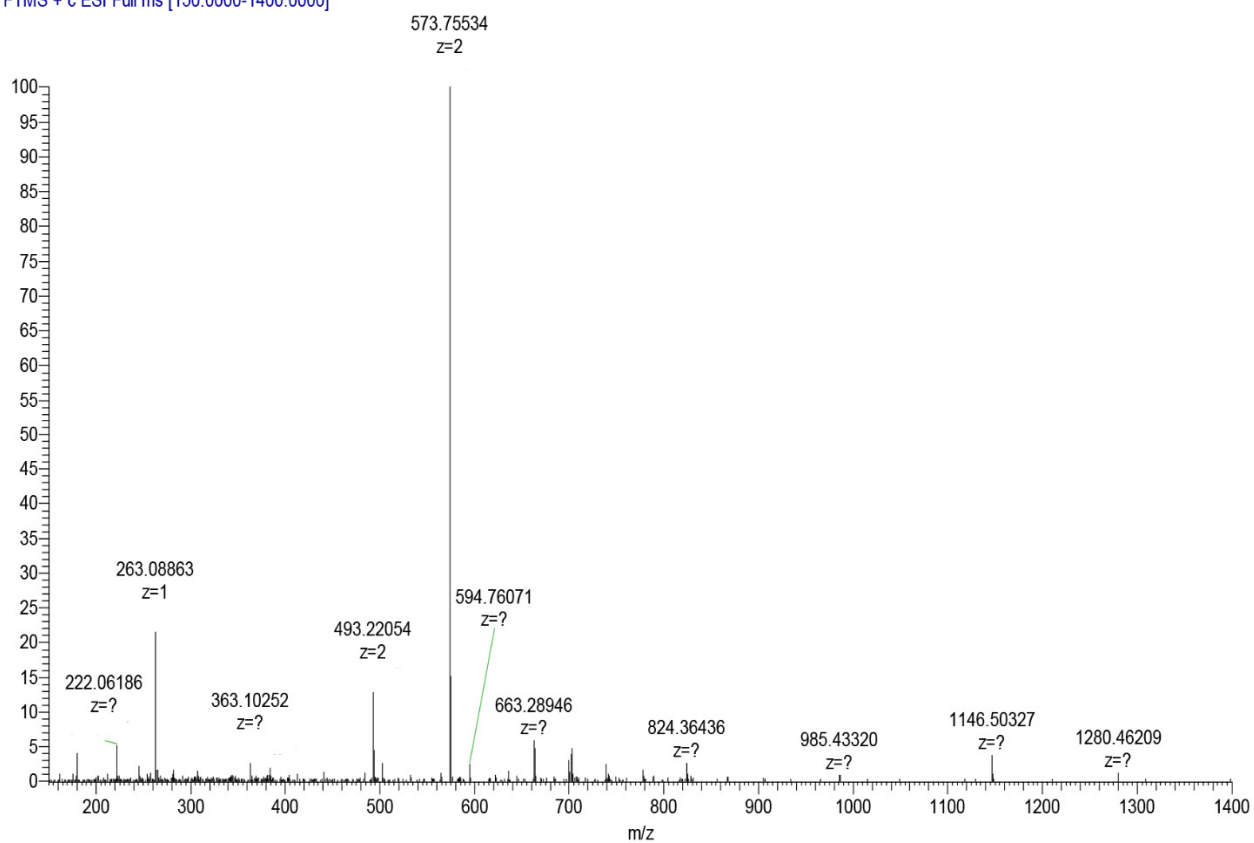

Figure S19 Mass spectrum of COST when RT=18.67min

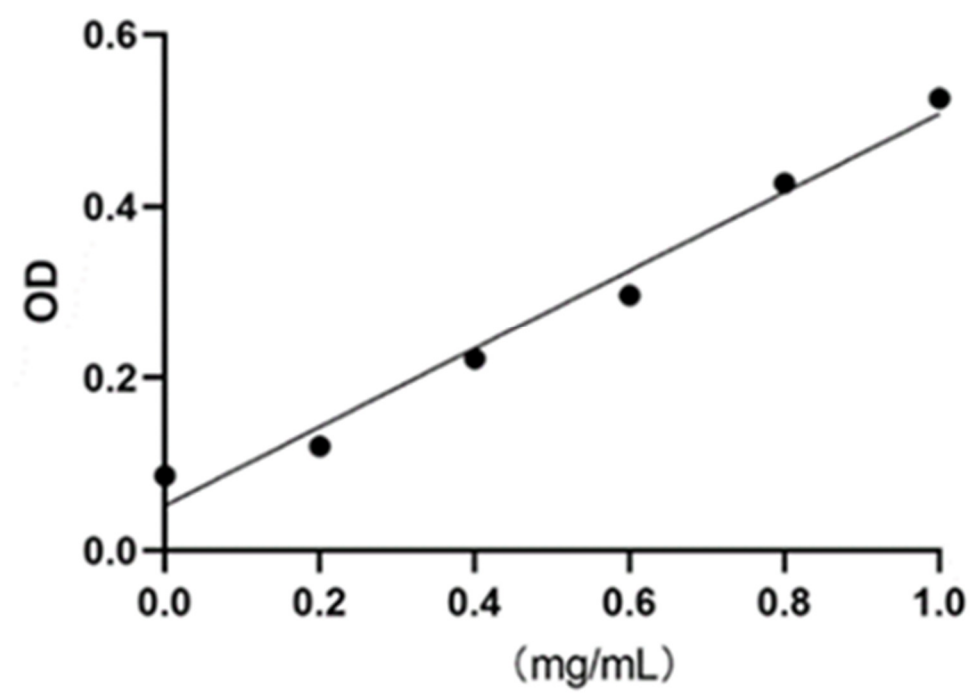

Figure S20 Standard curve of photometric method
